# Supplementary material for: Proposed Mechanism for Emodin as Agent for Methicillin Resistant Staphylococcus Aureus: In Vitro Testing and In Silico Study
Source: MDPI journal article supplement (doi:10.3390/cimb44100307), 2022-09-27
Supplement: s1 [file s1]

# Proposed Mechanism for Emodin as Agent for Methicillin Resistant Staphylococcus Aureus: In Vitro Testing and In Silico Study

Mohammed M. Ghoneim <sup>1,2,†</sup>, Rasha Hamed Al-Serwi <sup>3,†</sup>, Mohamed El-Sherbiny <sup>4</sup>, El-sayed M. El-ghaly <sup>1</sup>, Amal E. Hamad <sup>5</sup>, Mohamed A. Abdelgawad <sup>6</sup>, Ehab A. Ragab <sup>1</sup>, Sarah I. Bukhari <sup>7</sup>, Khulud Bukhari <sup>8</sup>, Khaled Elokely <sup>9,\*</sup> and Manal A. Nael <sup>9,10,\*</sup>

<sup>1</sup> Pharmacognosy and Medicinal Plants Department, Faculty of Pharmacy, Al-Azhar University, Cairo 11884, Egypt

<sup>2</sup> Department of Pharmacy Practice, College of Pharmacy, AlMaarefa University, Riyadh 11597, Saudi Arabia

<sup>3</sup> Department of Basic Dental Sciences, College of Dentistry, Princess Nourah bint Abdulrahman University, Riyadh 11671, Saudi Arabia

<sup>4</sup> Department of Basic Medical Sciences, College of Medicine, AlMaarefa University, Riyadh 11597, Saudi Arabia

<sup>5</sup> Department of Pharmaceutical Analytical Chemistry, Faculty of Pharmacy, Menoufia University, Shebin El-Koum 32511, Egypt

<sup>6</sup> Department of Pharmaceutical Chemistry, College of Pharmacy, Jouf University, Sakaka 72341, Saudi Arabia

<sup>7</sup> Department of Pharmaceutics, College of Pharmacy, King Saud University, Riyadh 11451, Saudi Arabia

<sup>8</sup> Department of Microbiology and Parasitology, College of Veterinary Medicine, King Faisal University, Hofuf, Al-Ahsa 36362, Saudi Arabia

<sup>9</sup> Department of Chemistry, Institute for Computational Molecular Science, Temple University, Philadelphia, PA 19122, USA

<sup>10</sup> Department of Pharmaceutical Chemistry, Faculty of Pharmacy, Tanta University, Tanta 31527, Egypt

\* Correspondence: [kelokely@temple.edu](mailto:kelokely@temple.edu) (K.E.); [manal.nael@temple.edu](mailto:manal.nael@temple.edu) (M.A.N.)

† These authors contributed equally to this work.

## Table of Content

|                                                        | Page |
|--------------------------------------------------------|------|
| Figure S1. $^1\text{H}$ NMR spectrum of compound 1.    | 3    |
| Figure S2. $^{13}\text{C}$ NMR spectrum of compound 1. | 4    |
| Figure S3. HRESIMS (-) for compound 1.                 | 5    |
| Figure S4. $^1\text{H}$ NMR spectrum of compound 2.    | 6    |
| Figure S5. $^{13}\text{C}$ NMR spectrum of compound 2  | 7    |
| Figure S6. HRESIMS (-) for compound 2                  | 8    |
| Figure S7. Emodin contacts with amino acids in site 2  | 9    |
| Figure S8. Average contacts of emodin in site 2        | 10   |
| Figure S9. Emodin contacts with amino acids in site 3  | 11   |
| Figure S10. Average contacts of emodin in site 3       | 12   |

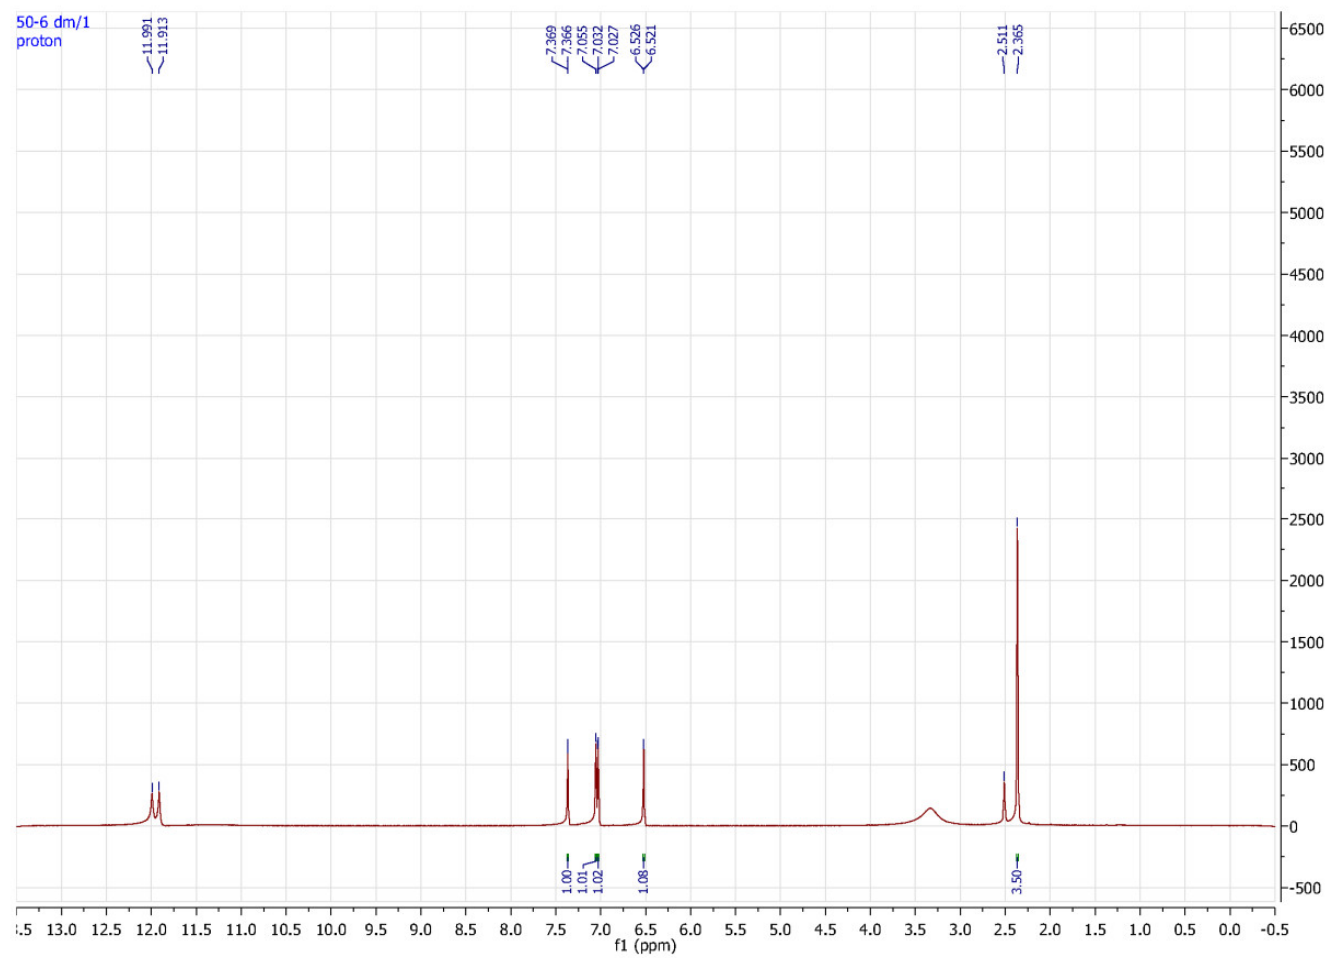

**Figure S1.**  $^1\text{H}$  NMR spectrum (400 MHz) for compound **1** in  $\text{DMSO-}d_6$ .

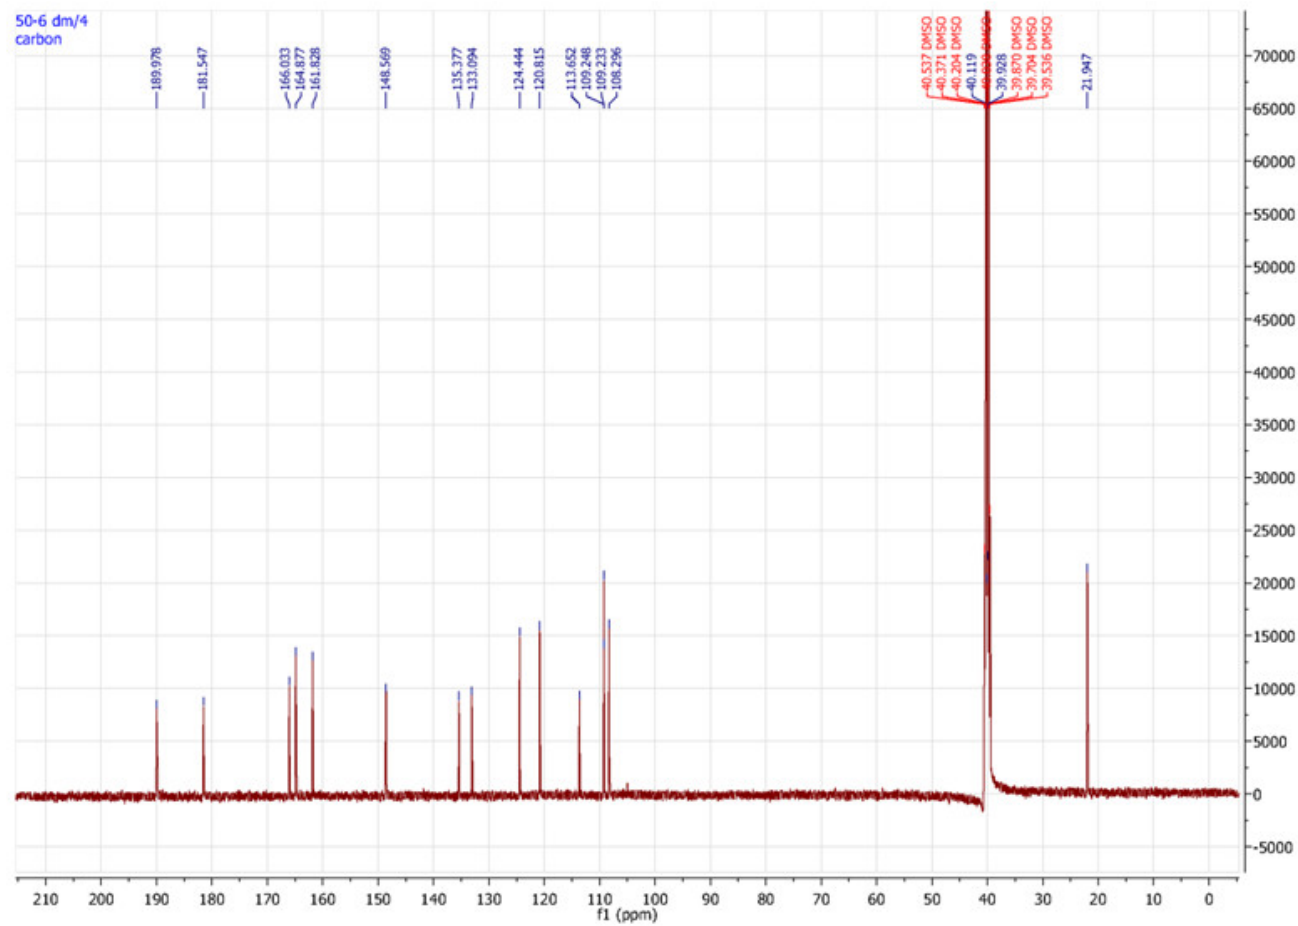

**Figure S2.**  $^{13}\text{C}$  NMR spectrum (400 MHz) for compound **1** in  $\text{DMSO-}d_6$

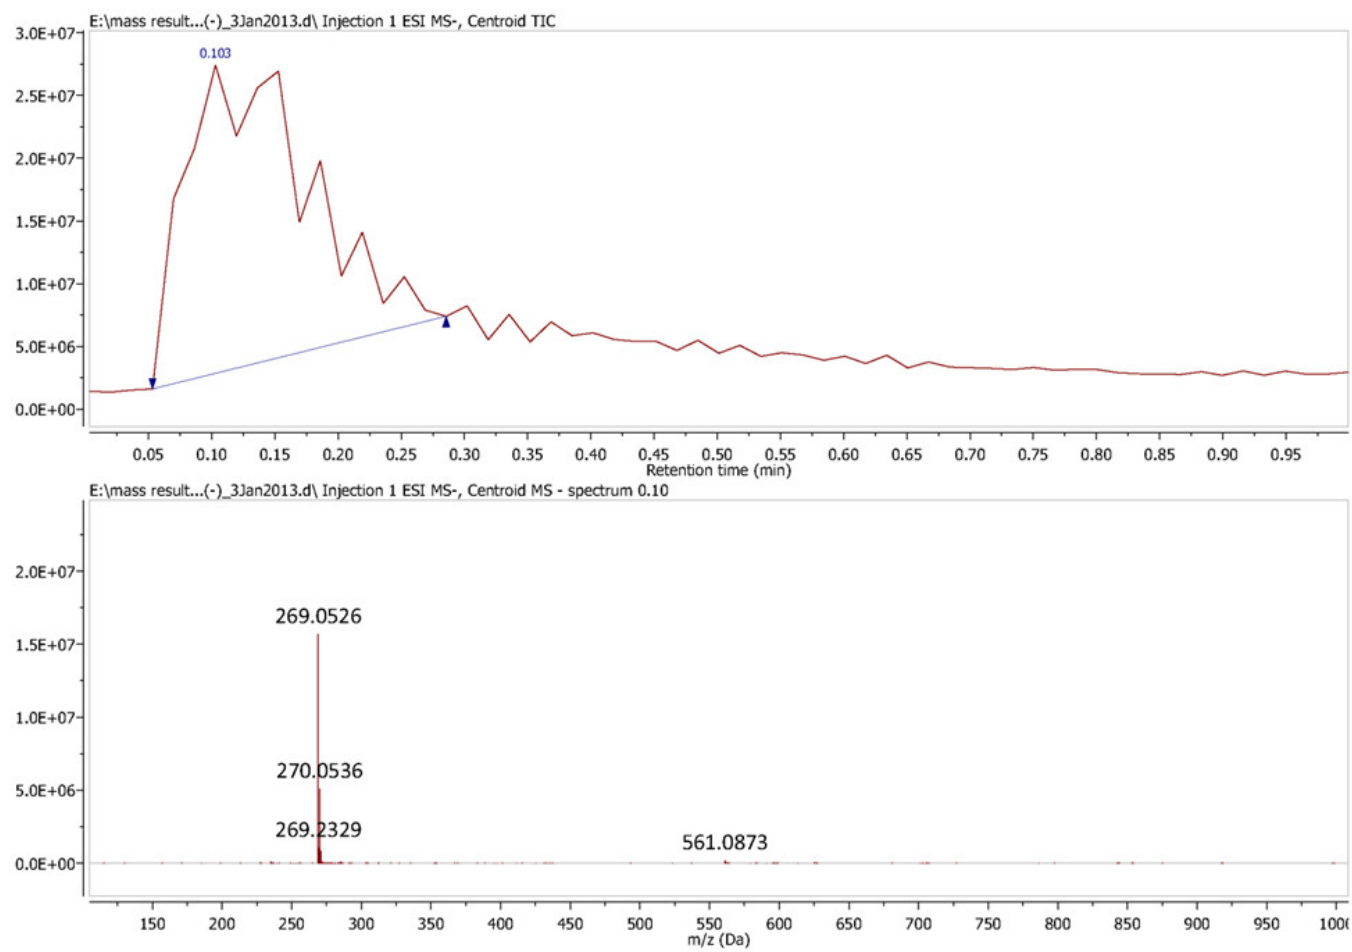

**Figure S3.** Negative ESI/MS spectrum for compound **1**

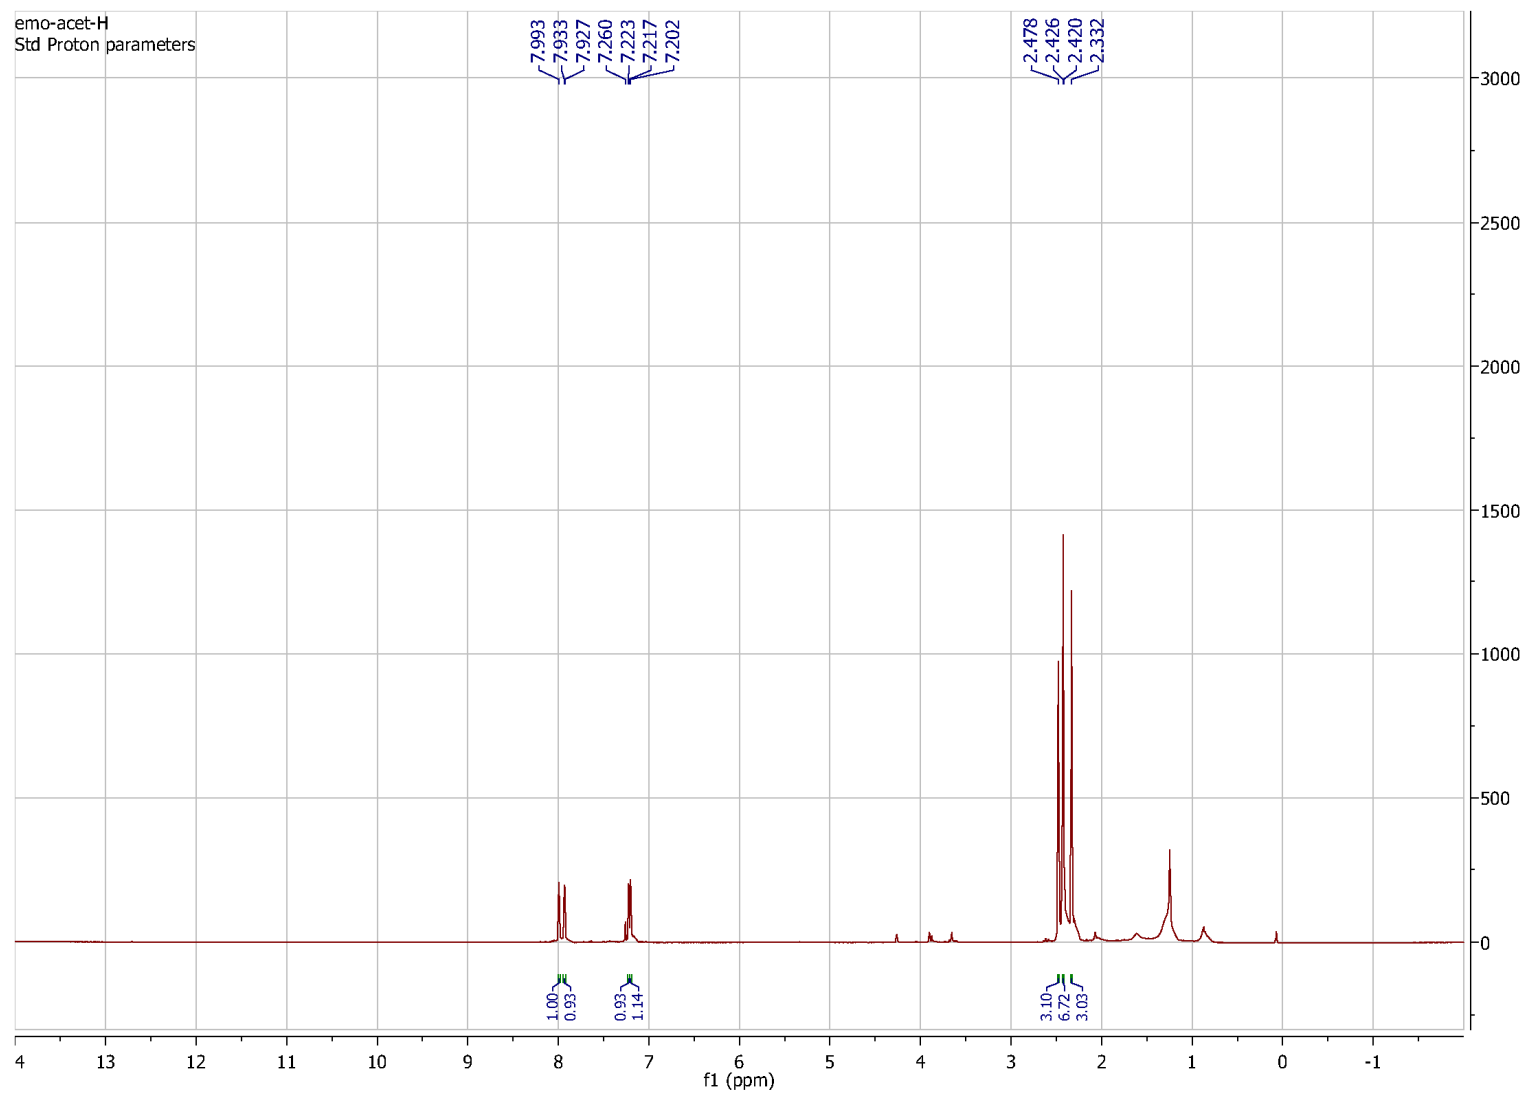

**Figure S4.**  $^1\text{H}$  NMR spectrum (400 MHz) for compound **2** in  $\text{CDCl}_3-d$ .

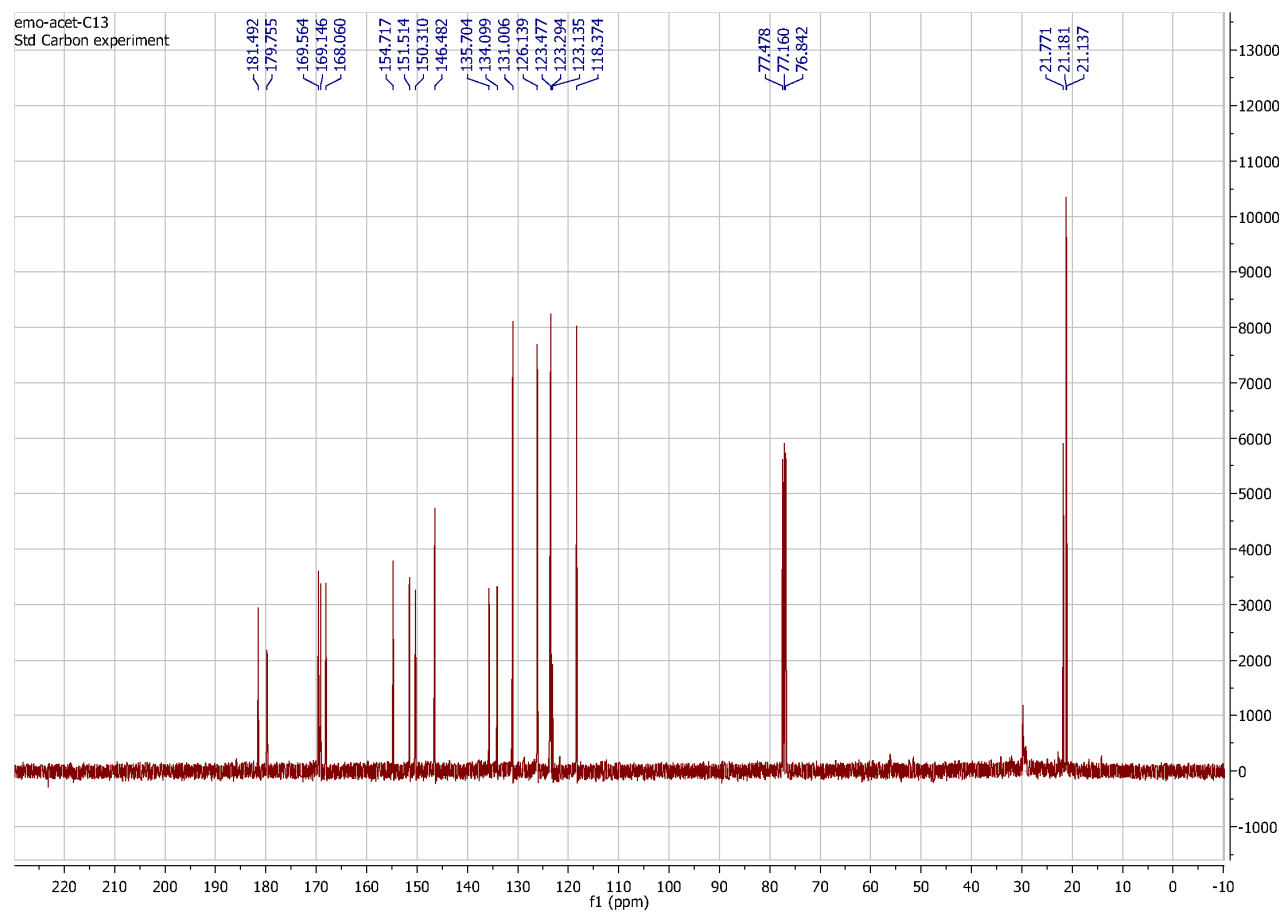

**Figure S5.**  $^{13}\text{C}$  NMR spectrum (400 MHz) for compound **2** in  $\text{CDCl}_3-d$

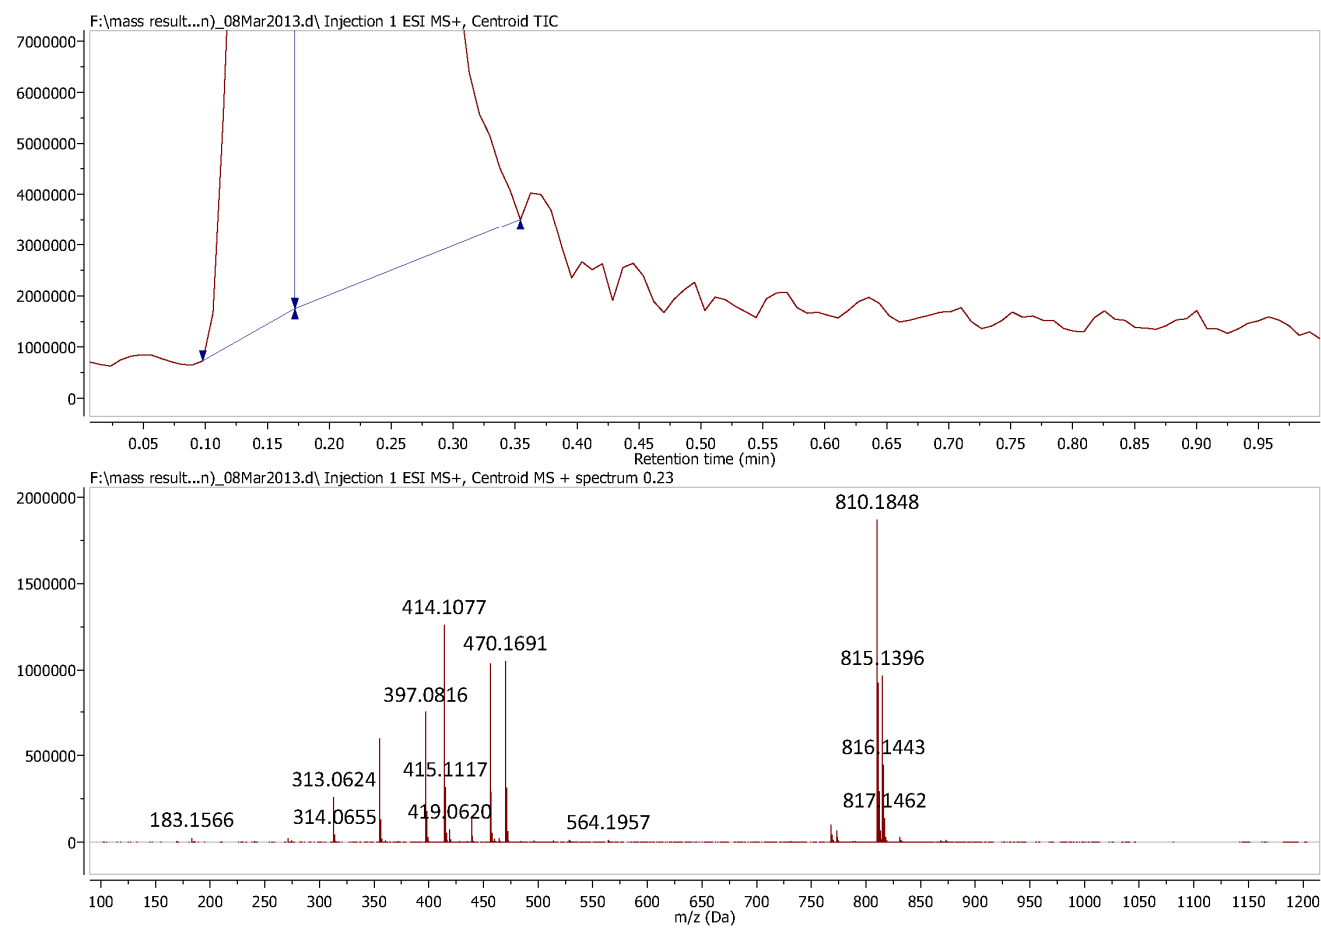

**Figure S6.** Positive ESI/MS spectrum for compound **2**



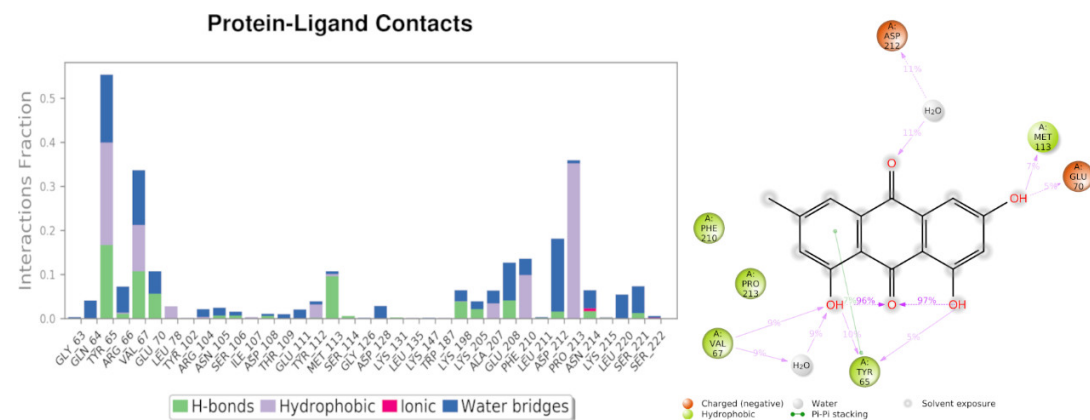

**Figure S7.** Emodin contacts with amino acids in site 2.

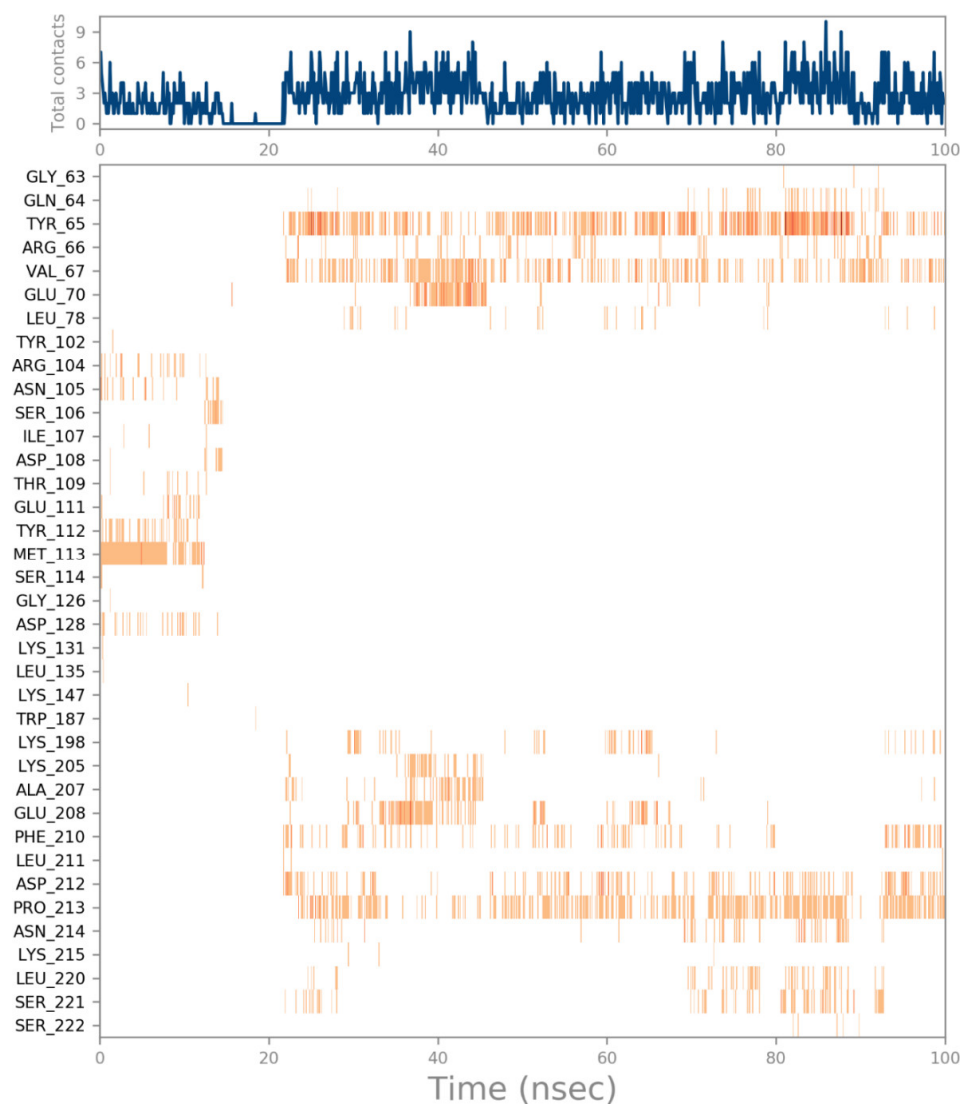

**Figure S8.** Average contacts of emodin in site 2.

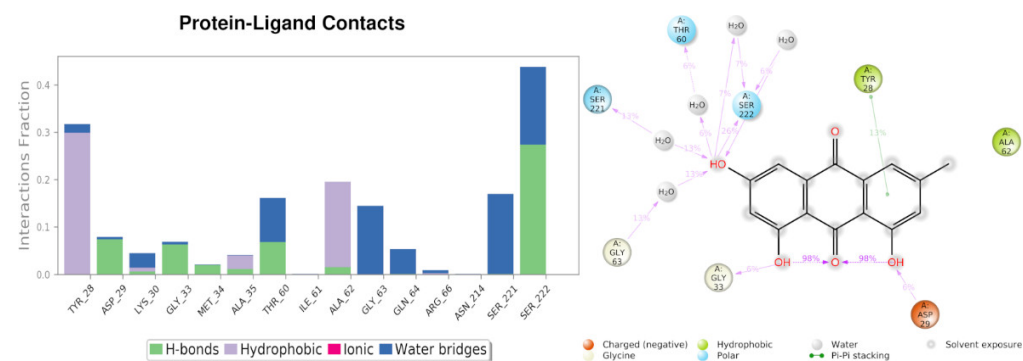

**Figure S9.** Emodin contacts with amino acids in site 3.

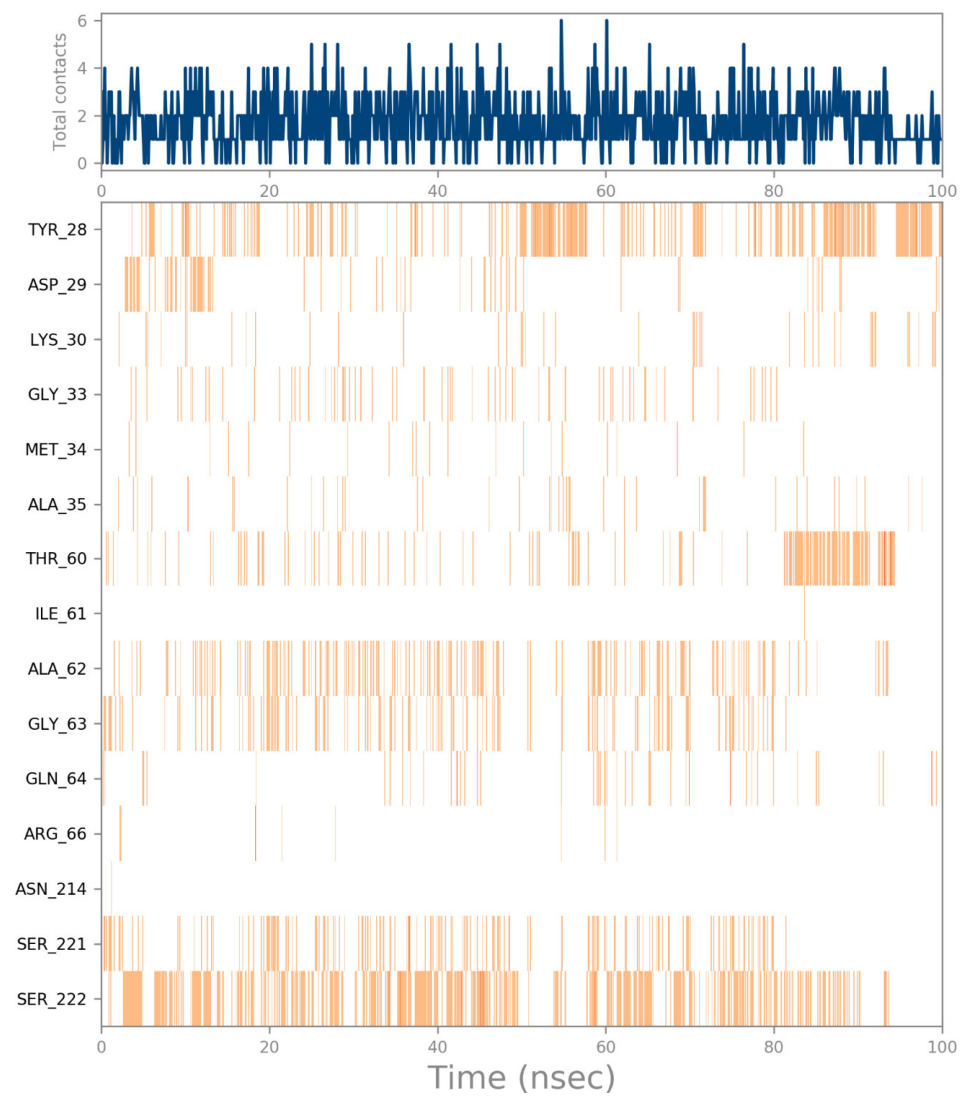

**Figure S10.** Average contacts of emodin in site 3.
